# Supplementary material for: Development and application of a next-generation sequencing protocol and bioinformatics pipeline for the comprehensive analysis of the canine immunoglobulin repertoire
Source: PLoS One. 2022 Jul 8;17(7):e0270710. doi: 10.1371/journal.pone.0270710 (PMC9269486; doi:10.1371/journal.pone.0270710)
Supplement: S2 Table — (XLSX) [file pone.0270710.s016.xlsx]

## Sheet: Sheet1
				Clinical Staging		Flow Cytometry Markers								Longest Diameter Peripheral Lymph Node Measurements, Enrollment (T1), cm						Longest Diameter Peripheral Lymph Node Measurements, 6 Weeks (T2), cm
DogID	Reported Breed	Sex	Age at Enrollment (years)	Stage	Substage	CD3	CD5	CD4	CD8	CD21	PARR	Chemotherapy Protocol	Overall Response	SM-R	SM-L	PS-R	PS-L	PL-R	PL-L	SM-R	SM-L	PS-R	PS-L	PL-R	PL-L	Notes
D02154	Newfoundland	M	5	III	a	neg	neg	neg	neg	pos	not performed	CHOP	PR	9	5	6.5	6	5	4.2	4	5	2	2	2.5	2.5
D02219	Jack Russell Terrier	F	3.83333	III	a	neg	neg	neg	neg	pos	not performed	CHOP	CR	4.5	4.5	2.4	2.5	2.3	2.2	1	1	1	1	1	1
D02220	Labrador Retriever	M	2.16667	V	b	neg	neg	neg	neg	pos	not performed	CHOP	CR	4	4.2	4.2	4	4.1	4	1	1	1	1	1.5	1.5	could not properly validate sample identity after sequencing and eliminated from downstream analsyes
D02244	German Shepherd	M	3.91667	III	a	neg	neg	neg	neg	pos	not performed	CHOP	CR	6.8	6.5	3.7	3.7	3	2.8	1.3	1.5	2	2	1	1	could not properly validate sample identity after sequencing and eliminated from downstream analsyes
D02267	Labrador Retriever	M	11.3333	V	b	neg	neg	neg	neg	pos	not performed	CHOP	NA	6.5	5.6	3.9	3.7	2.5	2.6	not performed	not performed	not performed	not performed	not performed	not performed	euthanized prior to 6-week time point
D02269	English Setter	M	10.0833	IV	b	neg	neg	neg	neg	pos	not performed	CHOP	PR	6	5.8	8.5	7.5	3.2	3.2	1.6	2.1	1	2.4	1.8	2.3
D02292	Bassett Hound	F	9	III	a	neg	neg	neg	neg	pos	not performed	CHOP	PR	4.5	3	8.5	8.5	3	2.3	1	1	3.5	3.5	3.3	2
D02386	German Shepherd	F	4	III	a	neg	neg	neg	neg	pos	not performed	adriamycin only	CR	7.5	6.2	10	11.5	4.5	5	1	1	1.3	1.7	1	1
D02543	Labrador Retriever	F	13.5833	III	b	neg	neg	neg	neg	pos	not performed	CHOP	PR	6.3	6.2	5.2	5.3	2.2	2.4	3.4	3.7	2.3	3.2	1.7	1.5
D02640	Bernese Mountain Dog	M	10.5	IV	b	neg	neg	neg	neg	pos	not performed	CHOP	PR	10	10	5.8	6.2	3.8	4	3.1	2	3	3	1.5	1.5
D02741	Siberian Husky	F	8.66667	V	a	neg	neg	neg	neg	pos	not performed	see notes	SD	4	4.2	3	3.1	1.7	1.7	3.9	4.5	3.3	3.2	2.2	2.9	intended to pursue CHOP, but ultimately elected prednisone only
D02770	Scottish Terrier	M	9.5	IV	b	neg	neg	neg	neg	pos	not performed	L-CHOP	NA	3.6	3.4	2.5	2.6	2.3	2.1	not performed	not performed	not performed	not performed	not performed	not performed	died prior to 6-week time point from acute tumor lysis syndrome after L-asparaginase therapy
D02976	American Staffordshire Terrier	F	10.8333	V	b	neg	neg	neg	neg	pos	not performed	CHOP	CR	4.4	5	2.7	3	1.9	2.7	1.9	1.9	1.4	1.6	1.2	1.3
D02977	Rat Terrier	M	9.16667	III	a	neg	neg	neg	neg	pos	not performed	see notes	NA	3.6	3.9	2.1	1.4	1.2	1.2	not performed	not performed	not performed	not performed	not performed	not performed	intended to pursue CHOP, but ultimately elected prednisone only; lymph nodes were not measured at T2
D03083	Great Dane	M	4.41667	V	b	neg	neg	neg	neg	pos	not performed	CHOP	PR	7	5.7	3.1	2	2.5	2.5	2.9	2.4	2.3	2.2	1.3	1.4
D03265	Australian Cattle Dog	F	9.5	IV	a	neg	neg	neg	neg	pos	not performed	CHOP	CR	2	2.2	2.8	2.6	1.8	1.8	1.2	1	1.8	1.8	1	1
D03631	Weimeraner	F	10	III	a	not performed	not performed	not performed	not performed	not performed	B-cell	CHOP	CR	6.4	6	6	6.4	3.5	4.3	0.9	2.7	1.2	1.2	0.9	0.9
D03728	German Shepherd	M	11.5833	III	b	neg	neg	neg	neg	pos	not performed	adriamycin only	NA	3.9	4	5.4	6	3.5	3.3	not performed	not performed	not performed	not performed	not performed	not performed	euthanized prior to 6-week time point
	Notes:
	Clinical Staging is based upon the World Health Organization TNM classification of tumors in domestic animals (Owen 1980; https://apps.who.int/iris/handle/10665/68618)
	Overall Response is based upon the Veterinary Cooperative Oncology Group consensus statement regarding response critera for peripheral nodal lymphoma (DOI: 10.1111/j.1476-5829.2009.00200.x) using the change in the sum of the longest diameter lymph node measurements from T1 to T2
	Abbreviations: CHOP (cyclophosphamide, doxorubicin, vincristine, prednisone); L-CHOP (same as CHOP but including L-asparaginase); PR (partial response); CR (complete response); SD (stable disease); NA (not applicable); SM (submandibular); PS (prescapular); PL (polpliteal); R (right); L (left)
