# Supplementary material for: Development and application of a next-generation sequencing protocol and bioinformatics pipeline for the comprehensive analysis of the canine immunoglobulin repertoire
Source: PLoS One. 2022 Jul 8;17(7):e0270710. doi: 10.1371/journal.pone.0270710 (PMC9269486; doi:10.1371/journal.pone.0270710)
Supplement: S6 Table — (XLSX) [file pone.0270710.s020.xlsx]

## Sheet: Sheet1
Time	Status	Metric	Chain	Sample size	Mean	SEM
T1	Control	1 - normalized Shannon-Wiener	IGH	17	0.134697	0.0263711
T1	Control	1 - normalized Shannon-Wiener	IGK	13	0.188902	0.0176119
T1	Control	1 - normalized Shannon-Wiener	IGL	15	0.0505693	0.0198128
T1	Case	1 - normalized Shannon-Wiener	IGH	9	0.367625	0.107451
T1	Case	1 - normalized Shannon-Wiener	IGK	7	0.210611	0.0154314
T1	Case	1 - normalized Shannon-Wiener	IGL	10	0.0775489	0.0377687
T2	Case	1 - normalized Shannon-Wiener	IGH	7	0.0762152	0.0196933
T2	Case	1 - normalized Shannon-Wiener	IGK	8	0.204266	0.0148496
T2	Case	1 - normalized Shannon-Wiener	IGL	9	0.0457527	0.0166387
T1	Control	Chao1	IGH	17	302.176	56.8803
T1	Control	Chao1	IGK	13	109.923	8.5496
T1	Control	Chao1	IGL	15	651.467	98.8701
T1	Case	Chao1	IGH	9	157.444	37.7808
T1	Case	Chao1	IGK	7	112.714	10.3962
T1	Case	Chao1	IGL	10	572.3	138.106
T2	Case	Chao1	IGH	7	274.429	58.1434
T2	Case	Chao1	IGK	8	97.625	8.96409
T2	Case	Chao1	IGL	9	574.667	95.3091
T1	Control	Clones	IGH	17	4356.82	1587.88
T1	Control	Clones	IGK	13	2014.69	300.718
T1	Control	Clones	IGL	15	17453.7	3560.98
T1	Case	Clones	IGH	9	3376.67	748.878
T1	Case	Clones	IGK	7	1898.71	423.524
T1	Case	Clones	IGL	10	19311.6	8057.32
T2	Case	Clones	IGH	7	3819.86	1382.07
T2	Case	Clones	IGK	8	1770.12	352.457
T2	Case	Clones	IGL	9	13660.3	4903.96
T1	Control	d50	IGH	17	0.912279	0.0173341
T1	Control	d50	IGK	13	0.908852	0.00664288
T1	Control	d50	IGL	15	0.959864	0.00483028
T1	Case	d50	IGH	9	0.93728	0.0143976
T1	Case	d50	IGK	7	0.91004	0.0120583
T1	Case	d50	IGL	10	0.867669	0.0890033
T2	Case	d50	IGH	7	0.917013	0.01661
T2	Case	d50	IGK	8	0.897912	0.01348
T2	Case	d50	IGL	9	0.951159	0.011079
T1	Control	Efron-Thisted	IGH	17	191.706	24.6916
T1	Control	Efron-Thisted	IGK	13	92.6923	6.1147
T1	Control	Efron-Thisted	IGL	15	335.8	30.808
T1	Case	Efron-Thisted	IGH	9	131.444	35.1292
T1	Case	Efron-Thisted	IGK	7	89.1429	5.76289
T1	Case	Efron-Thisted	IGL	10	286.5	54.9
T2	Case	Efron-Thisted	IGH	7	214.571	36.3848
T2	Case	Efron-Thisted	IGK	8	82.25	5.11912
T2	Case	Efron-Thisted	IGL	9	324.556	38.6038
T1	Control	Gini	IGH	17	0.565307	0.0334502
T1	Control	Gini	IGK	13	0.678627	0.0268618
T1	Control	Gini	IGL	15	0.634037	0.0304867
T1	Case	Gini	IGH	9	0.73714	0.0640596
T1	Case	Gini	IGK	7	0.708043	0.023085
T1	Case	Gini	IGL	10	0.645236	0.0363805
T2	Case	Gini	IGH	7	0.545313	0.0497285
T2	Case	Gini	IGK	8	0.699853	0.0197445
T2	Case	Gini	IGL	9	0.605313	0.0486746
T1	Control	Inverse Simpson	IGH	17	37.3202	7.91022
T1	Control	Inverse Simpson	IGK	13	15.9766	3.56984
T1	Control	Inverse Simpson	IGL	15	95.8954	9.96904
T1	Case	Inverse Simpson	IGH	9	28.6884	11.1729
T1	Case	Inverse Simpson	IGK	7	11.6349	1.47428
T1	Case	Inverse Simpson	IGL	10	80.9016	16.9631
T2	Case	Inverse Simpson	IGH	7	55.4906	12.4485
T2	Case	Inverse Simpson	IGK	8	11.7211	1.10298
T2	Case	Inverse Simpson	IGL	9	90.8011	13.6315
T1	Control	Observed diversity	IGH	17	92.9412	7.79539
T1	Control	Observed diversity	IGK	13	58.3077	3.23915
T1	Control	Observed diversity	IGL	15	131.4	9.40152
T1	Case	Observed diversity	IGH	9	66	14.9694
T1	Case	Observed diversity	IGK	7	55.2857	2.9335
T1	Case	Observed diversity	IGL	10	111.9	18.8617
T2	Case	Observed diversity	IGH	7	102.571	10.1157
T2	Case	Observed diversity	IGK	8	52.125	2.71528
T2	Case	Observed diversity	IGL	9	131	10.1187

## Sheet: Sheet2
time,case_status,name,chain,index,sd,n,se
T1,0,reads,IGH,4356.82352941176,6546.99480902588,17,1587.87947811672
T1,0,reads,IGK,2014.69230769231,1084.25530393103,13,300.718314924393
T1,0,reads,IGL,17453.7333333333,13791.6028772514,15,3560.97655074007
T1,1,reads,IGH,3376.66666666667,2246.63448295445,9,748.878160984816
T1,1,reads,IGK,1898.71428571429,1120.53881596991,7,423.523863064449
T1,1,reads,IGL,19311.6,25479.4793737148,10,8057.31884162192
T2,1,reads,IGH,3819.85714285714,3656.6039539702,7,1382.0663864658
T2,1,reads,IGK,1770.125,996.900258300699,8,352.457466405522
T2,1,reads,IGL,13660.3333333333,14711.8808280926,9,4903.96027603088
T1,0,observedDiversity_mean,IGH,92.9411764705882,32.1412324519364,17,7.79539390216847
T1,0,observedDiversity_mean,IGK,58.3076923076923,11.6789312823321,13,3.2391527370053
T1,0,observedDiversity_mean,IGL,131.4,36.4119289715413,15,9.40151963400446
T1,1,observedDiversity_mean,IGH,66,44.9082397784638,9,14.9694132594879
T1,1,observedDiversity_mean,IGK,55.2857142857143,7.76132045711909,7,2.93350339643075
T1,1,observedDiversity_mean,IGL,111.9,59.6460858360006,10,18.861748475567
T2,1,observedDiversity_mean,IGH,102.571428571429,26.7635146101127,7,10.115657695486
T2,1,observedDiversity_mean,IGK,52.125,7.67998325891033,8,2.71528412088733
T2,1,observedDiversity_mean,IGL,131,30.3562184733211,9,10.118739491107
T1,0,chao1_mean,IGH,302.176470588235,234.523515690356,17,56.8803074636788
T1,0,chao1_mean,IGK,109.923076923077,30.8260213090108,13,8.5496000344757
T1,0,chao1_mean,IGL,651.466666666667,382.922384277744,15,98.8701344798493
T1,1,chao1_mean,IGH,157.444444444444,113.342524137138,9,37.7808413790461
T1,1,chao1_mean,IGK,112.714285714286,27.5058435349914,7,10.3962316563773
T1,1,chao1_mean,IGL,572.3,436.730796817546,10,138.106404228366
T2,1,chao1_mean,IGH,274.428571428571,153.833088273034,7,58.1434421404992
T2,1,chao1_mean,IGK,97.625,25.3542754918039,8,8.9640900661632
T2,1,chao1_mean,IGL,574.666666666667,285.927438347564,9,95.3091461158547
T1,0,efronThisted_mean,IGH,191.705882352941,101.806043967121,17,24.691592506042
T1,0,efronThisted_mean,IGK,92.6923076923077,22.0468615127891,13,6.11469920364729
T1,0,efronThisted_mean,IGL,335.8,119.319020157846,15,30.8080385304751
T1,1,efronThisted_mean,IGH,131.444444444444,105.387512437564,9,35.1291708125214
T1,1,efronThisted_mean,IGK,89.1428571428571,15.2471699169449,7,5.76288854254023
T1,1,efronThisted_mean,IGL,286.5,173.608915541672,10,54.899959522349
T2,1,efronThisted_mean,IGH,214.571428571429,96.2650111980068,7,36.384754226682
T2,1,efronThisted_mean,IGK,82.25,14.4790489032553,8,5.11911683231172
T2,1,efronThisted_mean,IGL,324.555555555556,115.811388808605,9,38.6037962695349
T1,0,mod_normShannonWiener,IGH,0.134697358583613,0.108730782191444,17,0.0263710882194912
T1,0,mod_normShannonWiener,IGK,0.188901909970616,0.0635005633994195,13,0.0176118874890353
T1,0,mod_normShannonWiener,IGL,0.0505693328195582,0.0767345283831055,15,0.0198127700337899
T1,1,mod_normShannonWiener,IGH,0.367625340410365,0.32235343523429,9,0.107451145078097
T1,1,mod_normShannonWiener,IGK,0.210610868606988,0.0408276877117778,7,0.0154314154701674
T1,1,mod_normShannonWiener,IGL,0.0775488826159817,0.119435244677517,10,0.0377687406080458
T2,1,mod_normShannonWiener,IGH,0.0762151843691598,0.0521035325859788,7,0.0196932842357786
T2,1,mod_normShannonWiener,IGK,0.204266298852994,0.0420011015784164,8,0.0148496318717016
T2,1,mod_normShannonWiener,IGL,0.0457527352518121,0.0499159697553392,9,0.0166386565851131
T1,0,gini,IGH,0.5653073535771,0.137918831981657,17,0.0334502301189522
T1,0,gini,IGK,0.67862665527541,0.0968514666024711,13,0.026861763764546
T1,0,gini,IGL,0.634037455942266,0.118074526946962,15,0.0304867117651268
T1,1,gini,IGH,0.73713972912319,0.192178923704228,9,0.0640596412347425
T1,1,gini,IGK,0.708042732175031,0.0610772950905062,7,0.0230850476517123
T1,1,gini,IGL,0.645236294309417,0.115045078128696,10,0.03638044804787
T2,1,gini,IGH,0.545313036146664,0.131569260188617,7,0.0497285060914044
T2,1,gini,IGK,0.699852908249725,0.0558459057405665,8,0.0197445093253296
T2,1,gini,IGL,0.605312991534427,0.146023784720423,9,0.0486745949068077
T1,0,d50Index_mean,IGH,0.912279408883811,0.0714701794190474,17,0.0173340646368575
T1,0,d50Index_mean,IGK,0.908851964055403,0.0239512486032418,13,0.00664288115002873
T1,0,d50Index_mean,IGL,0.959864307809539,0.0187076045338174,15,0.0048302827204606
T1,1,d50Index_mean,IGH,0.937279958295963,0.0431928950167591,9,0.014397631672253
T1,1,d50Index_mean,IGK,0.91003970332741,0.0319032136181664,7,0.0120582813224911
T1,1,d50Index_mean,IGL,0.867668704707922,0.281453163321453,10,0.0890033050755154
T2,1,d50Index_mean,IGH,0.917012678266332,0.0439458458910761,7,0.0166099684831653
T2,1,d50Index_mean,IGK,0.897911802325758,0.0381273018887798,8,0.0134800368569514
T2,1,d50Index_mean,IGL,0.951159199447635,0.03323688813507,9,0.01107896271169
T1,0,diversity,IGH,470.470588235294,689.161276266943,17,167.14616089024
T1,0,diversity,IGK,151.153846153846,60.8493305274678,13,16.8765677918801
T1,0,diversity,IGL,1928.06666666667,1463.31870694502,15,377.827265479455
T1,0,inverseSimpsonIndex_mean,IGH,37.320171138989,32.6146567394597,17,7.9102161576503
T1,0,inverseSimpsonIndex_mean,IGK,15.9765949760768,12.8712534739243,13,3.56984341382523
T1,0,inverseSimpsonIndex_mean,IGL,95.895439090817,38.6099406602186,15,9.96904381167223
T1,0,length,IGH,15.6744531112204,1.28999271569063,17,0.312869189592343
T1,0,length,IGK,11.0242263517494,0.0163632142818565,13,0.00453833908651062
T1,0,length,IGL,15.8161398916257,0.0356342151707925,15,0.00920071479411007
T1,0,max_clone,IGH,0.185469040725002,0.162846376929478,17,0.0394960478134931
T1,0,max_clone,IGK,0.195450896807031,0.0650074348069037,13,0.0180298184217441
T1,0,max_clone,IGL,0.0686808419456438,0.0883751782848191,15,0.0228183729143477
T1,0,normalizedShannonWienerIndex_mean,IGH,0.865302641416387,0.108730782191444,17,0.0263710882194912
T1,0,normalizedShannonWienerIndex_mean,IGK,0.811098090029384,0.0635005633994195,13,0.0176118874890353
T1,0,normalizedShannonWienerIndex_mean,IGL,0.949430667180442,0.0767345283831055,15,0.0198127700337899
T1,0,percent_mu,IGH,0.151626013376889,0.103926824558685,17,0.0252059573523819
T1,0,percent_mu,IGK,0.305063959105973,0.0696475066327642,13,0.0193167427978961
T1,0,percent_mu,IGL,0.144268131778446,0.0446560214752276,15,0.0115301351654292
T1,0,shannonWienerIndex_mean,IGH,59.1423339618777,36.9063087920635,17,8.95109467066702
T1,0,shannonWienerIndex_mean,IGK,29.419128965617,14.2509311477382,13,3.9524971520213
T1,0,shannonWienerIndex_mean,IGL,115.747036564211,41.9024347783096,15,10.8191621374624
T1,1,diversity,IGH,246.777777777778,165.314683087875,9,55.1048943626249
T1,1,diversity,IGK,150.428571428571,63.2767918035703,7,23.916379267751
T1,1,diversity,IGL,1910.1,1775.94997739864,10,561.604693910425
T1,1,inverseSimpsonIndex_mean,IGH,28.6883987593603,33.5187157422925,9,11.1729052474308
T1,1,inverseSimpsonIndex_mean,IGK,11.6349014290478,3.90058684913951,7,1.47428325286174
T1,1,inverseSimpsonIndex_mean,IGL,80.9015517704603,53.6419065985761,10,16.9630602885516
T1,1,length,IGH,15.2609811524657,1.22988213579488,9,0.409960711931628
T1,1,length,IGK,11.0217278064484,0.0481968040414932,7,0.018216679640272
T1,1,length,IGL,15.8263472391665,0.0990802365980542,10,0.0313319218758224
T1,1,max_clone,IGH,0.440291741701362,0.386434016123082,9,0.128811338707694
T1,1,max_clone,IGK,0.2074198739137,0.0579730544617199,7,0.0219117549783592
T1,1,max_clone,IGL,0.187503719746477,0.306272682715201,10,0.0968519262470117
T1,1,normalizedShannonWienerIndex_mean,IGH,0.632374659589635,0.32235343523429,9,0.107451145078097
T1,1,normalizedShannonWienerIndex_mean,IGK,0.789389131393012,0.0408276877117778,7,0.0154314154701674
T1,1,normalizedShannonWienerIndex_mean,IGL,0.922451117384018,0.119435244677517,10,0.0377687406080458
T1,1,percent_mu,IGH,0.10428945553423,0.0832149624759076,9,0.0277383208253025
T1,1,percent_mu,IGK,0.320632728189918,0.0503536342035502,7,0.0190318848158442
T1,1,percent_mu,IGL,0.114287474399355,0.0593092150086465,10,0.0187552205663966
T1,1,shannonWienerIndex_mean,IGH,40.940398720928,44.1502624739577,9,14.7167541579859
T1,1,shannonWienerIndex_mean,IGK,24.5098518706416,5.47616146070193,7,2.06979448060765
T1,1,shannonWienerIndex_mean,IGL,97.6177910403418,61.0754373589772,10,19.3137491145307
T2,1,diversity,IGH,404.285714285714,361.823950877456,7,136.756598915514
T2,1,diversity,IGK,124.25,38.6883149579523,8,13.6783849297245
T2,1,diversity,IGL,1557.33333333333,1075.04930119507,9,358.349767065022
T2,1,inverseSimpsonIndex_mean,IGH,55.4905824797373,32.9356098348745,7,12.4484904144759
T2,1,inverseSimpsonIndex_mean,IGK,11.7211052371595,3.11968970359852,8,1.10297687230618
T2,1,inverseSimpsonIndex_mean,IGL,90.801050005904,40.8945712651828,9,13.6315237550609
T2,1,length,IGH,15.1812310187764,0.296342094348511,7,0.112006783520885
T2,1,length,IGK,11.0017568460641,0.0637302140837097,8,0.0225320332725308
T2,1,length,IGL,15.7913253002871,0.0367925151141504,9,0.0122641717047168
T2,1,max_clone,IGH,0.0762143197373865,0.0852612668349669,7,0.0322257297873774
T2,1,max_clone,IGK,0.205804850624762,0.0321108112743066,8,0.0113528862007318
T2,1,max_clone,IGL,0.0650459905228968,0.0569725999169656,9,0.0189908666389885
T2,1,normalizedShannonWienerIndex_mean,IGH,0.92378481563084,0.0521035325859788,7,0.0196932842357786
T2,1,normalizedShannonWienerIndex_mean,IGK,0.795733701147006,0.0420011015784164,8,0.0148496318717016
T2,1,normalizedShannonWienerIndex_mean,IGL,0.954247264748188,0.0499159697553392,9,0.0166386565851131
T2,1,percent_mu,IGH,0.113901436694715,0.0391993807236362,7,0.0148159732774972
T2,1,percent_mu,IGK,0.318402058052377,0.0512030843562737,8,0.018103024082994
T2,1,percent_mu,IGL,0.135095943124537,0.0293104148785287,9,0.0097701382928429
T2,1,shannonWienerIndex_mean,IGH,76.1263624698507,31.5951391539613,7,11.9418401199802
T2,1,shannonWienerIndex_mean,IGK,23.8630048772463,4.61959436331731,8,1.63327325031641
T2,1,shannonWienerIndex_mean,IGL,112.610486293586,39.9984133315359,9,13.3328044438453
